# Supplementary material for: Expression of hypoxia-inducible factor-1α predicts benefit from hypoxia modification in invasive bladder cancer
Source: PubMed Central journal article supplement — Br J Cancer. 2014 Jun 17;111(3):437–43. doi: 10.1038/bjc.2014.315 (PMC4119984; doi:10.1038/bjc.2014.315), 2014-06-17
Supplement: bjc2014315x1.pdf [file bjc2014315x1.pdf]

HIF-1 $\alpha$  high

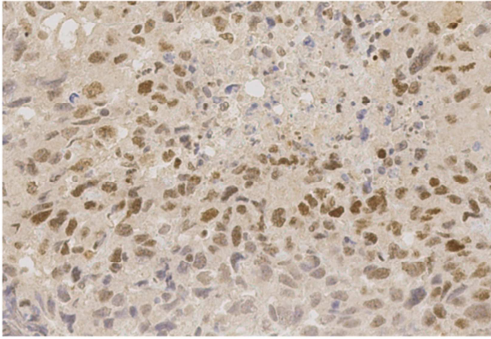

HIF-1 $\alpha$  low

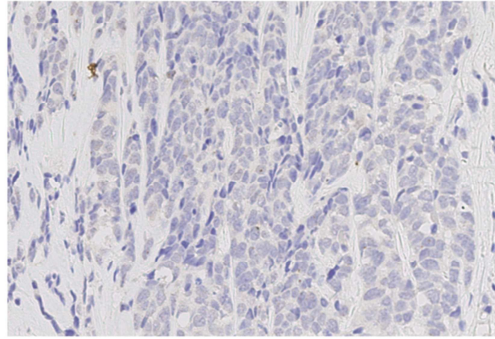

CAIX high

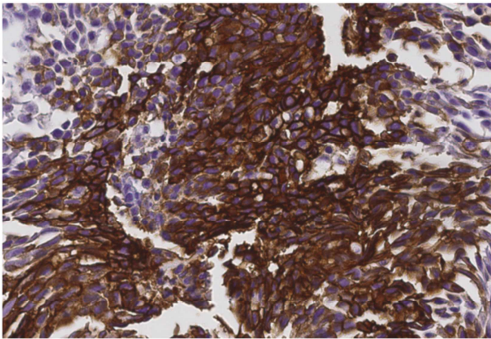

CAIX low

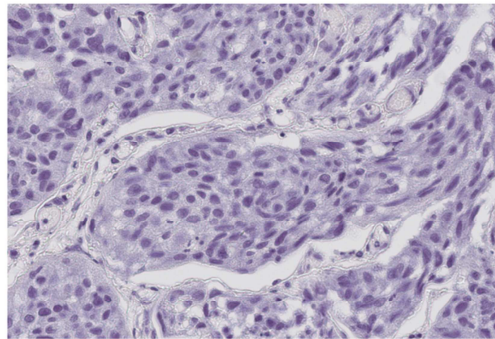

GLUT1 high

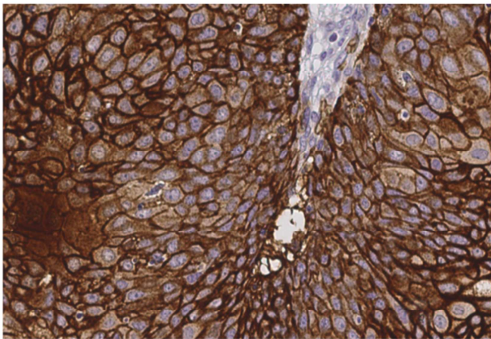

GLUT1 low

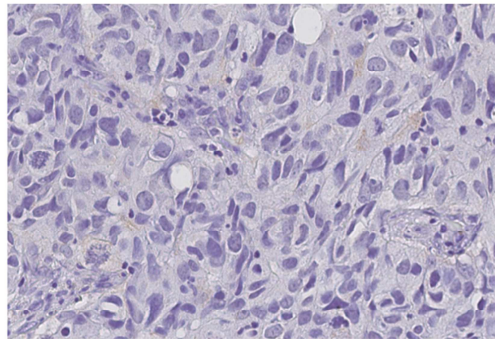

Supplementary Figure 1. Examples of tumours with high and low protein expression of the markers studied.
